# Supplementary material for: Plasticity of left perisylvian white-matter tracts is associated with individual differences in math learning
Source: PubMed Central journal article supplement (PMC4819785; doi:10.1007/s00429-014-0975-6), 2015-01-21
Supplement: 429_2014_975_MOESM2_ESM.pdf [file 429_2014_975_MOESM2_ESM.pdf]

Online Resource 2: Supplementary Tables

**Plasticity of left perisylvian white-matter tracts is associated with individual differences in math learning**

*Dietsje Jolles\**, *Demian Wassermann\**, *Ritika Chokhani*, *Jennifer Richardson*, *Caitlin Tenison*, *Roland Bammer*, *Lynn Fuchs*, *Kaustubh Supekar*, *Vinod Menon*

Address for correspondence: [d.d.jolles@fsw.leidenuniv.nl](mailto:d.d.jolles@fsw.leidenuniv.nl); [menon@stanford.edu](mailto:menon@stanford.edu)

\* *contributed equally to this work*

Submitted to Brain Structure and Function

**Table 1 Mean scores and standard deviations on neuropsychological measures**

|                                | Mean     | SD    | n  |
|--------------------------------|----------|-------|----|
| Age                            | 8.55     | 0.39  |    |
| Gender                         | 11F / 7M |       |    |
| IQ                             |          |       |    |
| Verbal IQ                      | 105.67   | 16.57 | 18 |
| Performance IQ                 | 104.17   | 11.26 | 18 |
| Full-scale IQ                  | 105.56   | 12.11 | 18 |
| Math                           |          |       |    |
| WIAT-II Numerical Operations   | 101.67   | 14.04 | 18 |
| WIAT-II Mathematical Reasoning | 105.39   | 12.46 | 18 |
| Keymath Numeration             | 9.88     | 2.12  | 17 |
| Keymath Algebra                | 9.47     | 2.65  | 17 |
| Reading                        |          |       |    |
| WIAT-II Word Reading           | 104.94   | 9.91  | 18 |
| WIAT-II Reading Comprehension  | 108.00   | 10.87 | 18 |
| Working Memory                 |          |       |    |
| WMTB-C Digit Recall            | 99.89    | 15.99 | 18 |
| WMTB-C Backward Digit Recall   | 89.11    | 16.40 | 18 |
| WMTB-C Block Recall            | 91.94    | 11.62 | 18 |
| WMTB-C Count Recall            | 83.41    | 16.82 | 17 |

WIAT = Wechsler Individual Achievement Test; WMTB-C = Working Memory Test Battery for Children

**Table 2 FA changes in each of the six tracts of interest**

| <b>Tracts</b> | <b>Repeated Measures ANOVA</b>       |
|---------------|--------------------------------------|
| Left SLF-FP   | $F(1,17) = 0.007, p = .933$          |
| Left SLF-FT   | $F(1,16) = 1.972, p = .179^{\wedge}$ |
| Left SLF-PT   | $F(1,17) = 0.325, p = .576$          |
| Right SLF-FP  | $F(1,17) = 0.005, p = .943$          |
| Right SLF-FT  | $F(1,17) = 0.819, p = .378$          |
| Right SLF-PT  | $F(1,17) = 0.424, p = .524$          |

<sup>^</sup> One outlier was excluded from this analysis (with FA change > 3 SDs).

**Table 3 Correlation between performance changes and FA changes in each of the six tracts of interest**

| <b>Tracts</b> | <b>Pearson Correlation</b> | <b><i>p</i></b> | <b><i>n</i></b> |
|---------------|----------------------------|-----------------|-----------------|
| Left SLF-FP   | -.010                      | .969            | 18              |
| Left SLF-FT   | .630                       | .007**          | 17 <sup>^</sup> |
| Left SLF-PT   | -.259                      | .299            | 18              |
| Right SLF-FP  | .466                       | .051            | 18              |
| Right SLF-FT  | -.269                      | .281            | 18              |
| Right SLF-PT  | -.302                      | .223            | 18              |

\*\*  $p < .01$ ; <sup>^</sup> One outlier was excluded from this analysis (with FA change > 3 SDs). A non-parametric correlation including the outlier was still significant ( $p < .05$ ).

**Table 4 Correlation between FA in the SLF-FT before tutoring and math ability**

| <b>Tracts</b>                  | <b>Pearson<br/>Correlation</b> | <b><i>p</i></b> | <b>n</b> |
|--------------------------------|--------------------------------|-----------------|----------|
| WIAT-II Numerical Operations   | -.216                          | .405            | 17       |
| WIAT-II Mathematical Reasoning | -.124                          | .636            | 17       |
| Keymath Numeration             | -.077                          | .777            | 16       |
| Keymath Algebra                | -.225                          | .402            | 16       |
| Efficiency                     | -.014                          | .959            | 17       |

One outlier was excluded from all analyses (with FA change > 3 SDs).
