# Supplementary material for: Plasticity of left perisylvian white-matter tracts is associated with individual differences in math learning
Source: PubMed Central journal article supplement (PMC4819785; doi:10.1007/s00429-014-0975-6), 2015-01-21
Supplement: 429_2014_975_MOESM3_ESM.pdf [file 429_2014_975_MOESM3_ESM.pdf]

Online Resource 3: White Matter Query Language (WMQL) Script

## **Plasticity of left perisylvian white-matter tracts is associated with individual differences in math learning**

*Dietsje Jolles\**, *Demian Wassermann\**, *Ritika Chokhani*, *Jennifer Richardson*, *Caitlin Tenison*,  
*Roland Bammer*, *Lynn Fuchs*, *Kaustubh Supekar*, *Vinod Menon*

Address for correspondence: d.d.jolles@fsw.leidenuniv.nl; menon@stanford.edu

*\* contributed equally to this work*

Submitted to Brain Structure and Function

### **White Matter Query Language (WMQL) Script**

#Obtain all parcellation definitions from Freesurfer  
import FreeSurfer.qry

```
middlefrontalgyrus.side |= (  
    rostralmiddlefrontal.side or  
    caudalmiddlefrontal.side  
)
```

```
inferiorfrontalgyrus.side |= (  
    parsopercularis.side or  
    parstriangularis.side or  
    parsorbitalis.side  
)
```

```
orbitofrontalgyrus.side |= (  
    lateralorbitofrontal.side or  
    medialorbitofrontal.side  
)
```

```
frontal.side |= (  
    superiorfrontal.side or  
    middlefrontalgyrus.side or  
    inferiorfrontalgyrus.side or  
    orbitofrontalgyrus.side or  
    frontalpole.side or  
    precentral.side or  
    paracentral.side  
)
```

```
temporal.side |= (  
)
```

(entorhinal.side or parahippocampal.side or temporalpole.side or fusiform.side or superior temporal.side or middle temporal.side or inferior temporal.side or transversetemporal.side or bankssts.side)

)

parietal.side |= postcentral.side or precuneus.side or supramarginal.side or superiorparietal.side or inferiorparietal.side

superior\_parietal\_lobule.side |= postcentral.side or precuneus.side or superiorparietal.side

inferior\_parietal\_lobule.side |= supramarginal.side or inferiorparietal.side

subcortical.side |= VentralDC.side or Thalamus\_Proper.side or Pallidum.side or Putamen.side or Amygdala.side or Brain\_Stem or choroid\_plexus.side

inferior\_frontal\_gyrus.side |= parsopercularis.side or parstriangularis.side or parsorbitalis.side

middle\_frontal\_gyrus.side |= caudalmiddlefrontal.side or rostralmiddlefrontal.side

#Fronto-Parietal SLF

SLF\_FP.side = (endpoints\_in(inferiorparietal.side) or endpoints\_in(supramarginal.side)) and endpoints\_in(frontal.side) and only(parietal.side or frontal.side or unsegmentedwhitematter.side)

#Parieto-Temporal SLF

SLF\_PT.side = endpoints\_in(inferiorparietal.side) and endpoints\_in(temporal.side) and only(parietal.side or temporal.side or unsegmentedwhitematter.side)

#Fronto-Temporal SLF

SLF\_FT.side = (  
    (inferior\_frontal\_gyrus.side or middle\_frontal\_gyrus.side or precentral.side) and  
    (superiortemporal.side or middletemporal.side) and not medial\_of(supramarginal.side)  
    not in hemisphere.opposite  
    not in temporalpole.side not in frontalpole.side not in subcortical.side  
    not in rostralmiddlefrontal.side not in lateralorbitofrontal.side  
    not in parstriangularis.side not in superiorfrontal.side not in parsopercularis.side  
)
