# Supplementary material for: Plasticity of left perisylvian white-matter tracts is associated with individual differences in math learning
Source: PubMed Central journal article supplement (PMC4819785; doi:10.1007/s00429-014-0975-6), 2015-01-21
Supplement: 429_2014_975_MOESM4_ESM.pdf [file 429_2014_975_MOESM4_ESM.pdf]

Online Resource 4: Supplementary Figures

## Plasticity of left perisylvian white-matter tracts is associated with individual differences in math learning

*Dietsje Jolles\**, *Demian Wassermann\**, *Ritika Chokhani*, *Jennifer Richardson*, *Caitlin Tenison*, *Roland Bammer*, *Lynn Fuchs*, *Kaustubh Supekar*, *Vinod Menon*

Address for correspondence: [d.d.jolles@fsw.leidenuniv.nl](mailto:d.d.jolles@fsw.leidenuniv.nl); [menon@stanford.edu](mailto:menon@stanford.edu)

\* contributed equally to this work

Submitted to Brain Structure and Function

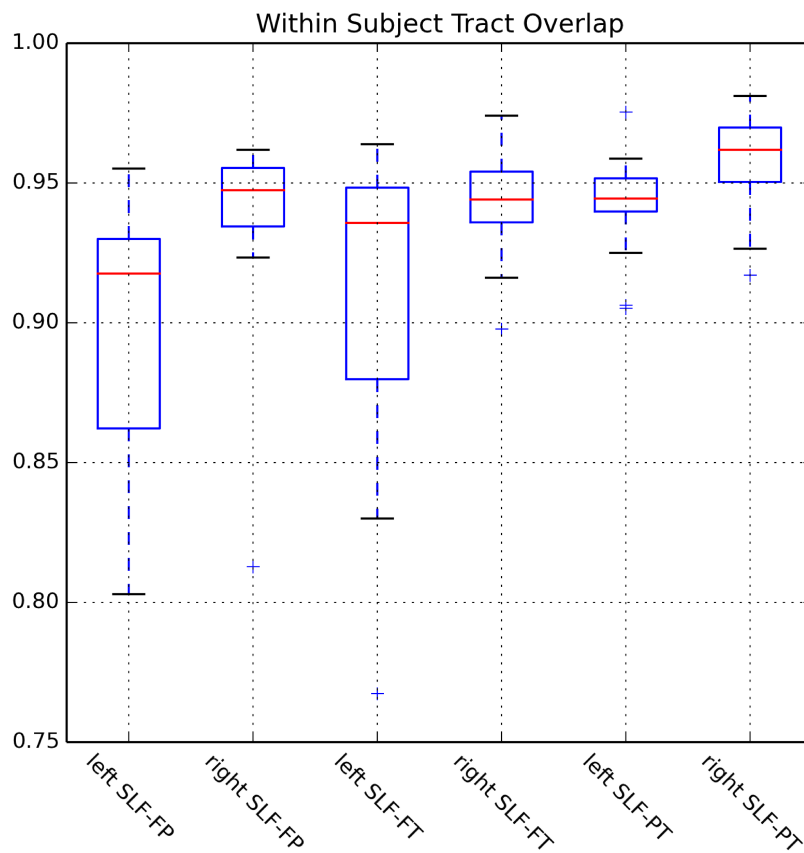

**Supplementary Fig. 1 High reliability of tract-identification.** From left to right, boxplots represent reliability of the left and right fronto-parietal section of the SLF (SLF-FP), fronto-temporal section of the SLF (SLF-FT), and parieto-temporal section of the SLF (SLF-PT). The within-subject overlap of the SLF tracts was quantified using the

Bhattacharyya coefficient, which has a maximum value of 1 (perfect overlap) and a minimum value of 0 (no overlap). An overlap of about 0.8 was considered an almost perfect overlap. The maximum average overlap was found for the right SLF-PT and the minimum overlap for the left SLF-FP.

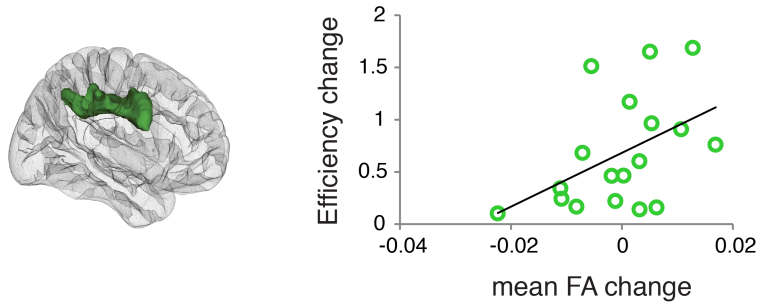

**Supplementary Fig. 2 Performance gains are marginally correlated with FA changes in the fronto-parietal part of the right superior longitudinal fasciculus (SLF-FP)** Performance efficiency was assessed using a composite of standardized accuracy and reaction time (RT) scores on addition and subtraction tasks (N = 18). FA = fractional anisotropy;  $p = .051$
